# Supplementary material
Source: PubMed Central journal article supplement (PMC5488363)
Supplement: Supp_Figure2.pdf [file Supp_Figure2.pdf]

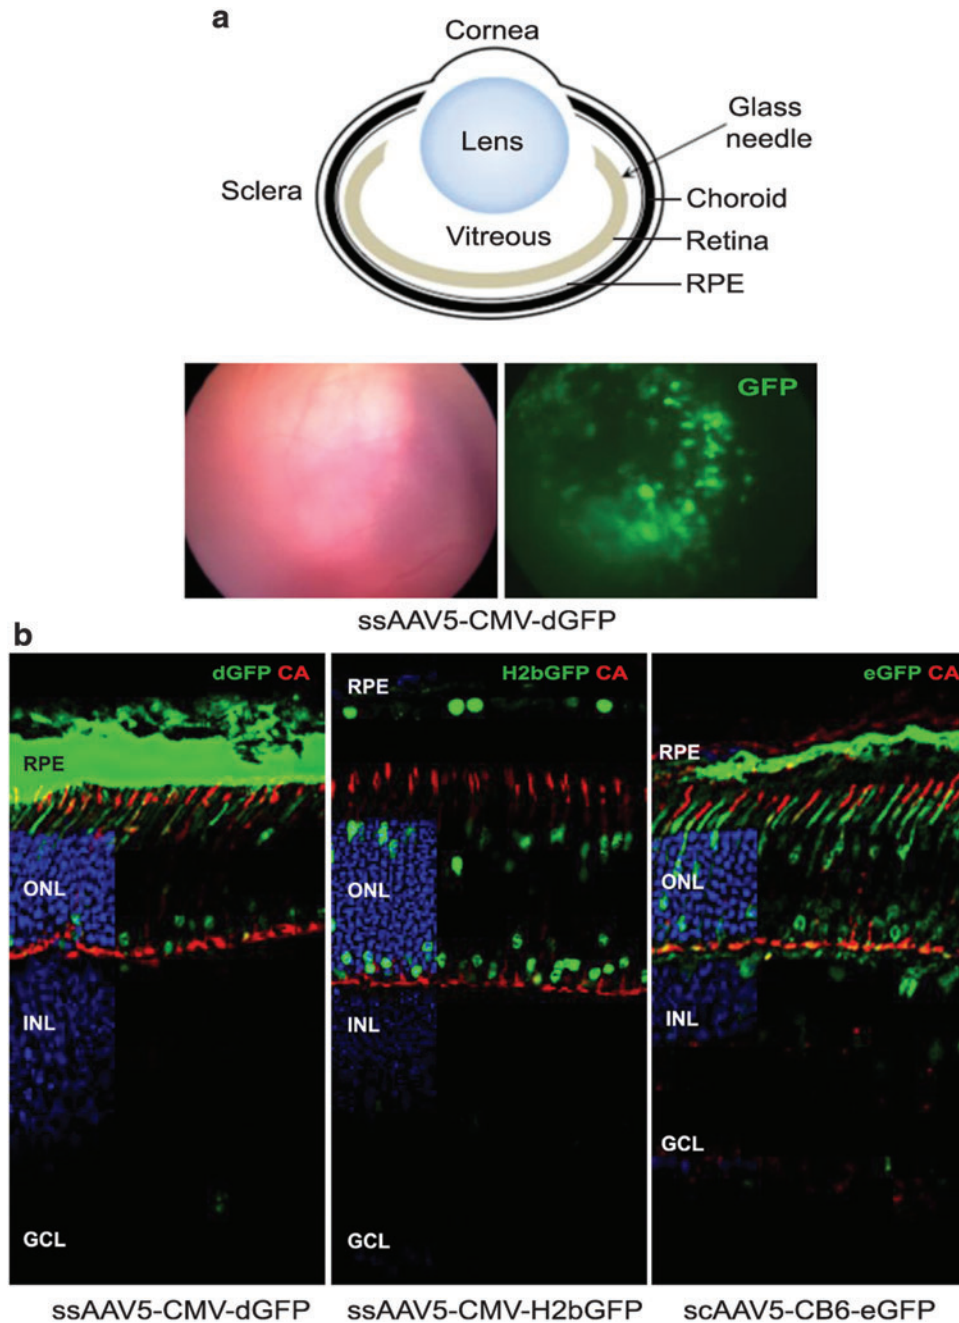

**Supplementary Figure S2.** Subretinal injections of AAV2/5 vectors at PND1. **(a)** Schematic of the subretinal injection route used in this study and representative fundus photography depicting *in vivo* GFP fluorescence in adult mouse retinas after subretinal delivery of AAV2/5-CMV-*dGFP* at PND1. Widespread fluorescence is seen, presumably because the interactions between the RPE and the PR outer segments that could limit the spread of the vector after injection have not yet formed at PND1. **(b)** Histological analysis showing the expression of GFP after subretinal injection of ssAAV5-CMV-*dGFP*, ssAAV5-CMV-*H2bGFP*, and scAAV5-CB6-*eGFP* at PND1. Tissue was harvested 3wpi. Cryosections were immunostained against CA (red). AAV-mediated GFP was detected by its native fluorescence (green). After PND1 subretinal injection, transgene expression is mostly present in the photoreceptors, in particular in the cones. RPE, retinal pigment epithelium; sc, self-complementary.
