# Supplementary material
Source: PubMed Central journal article supplement (PMC5488363)
Supplement: Supp_Figure3.pdf [file Supp_Figure3.pdf]

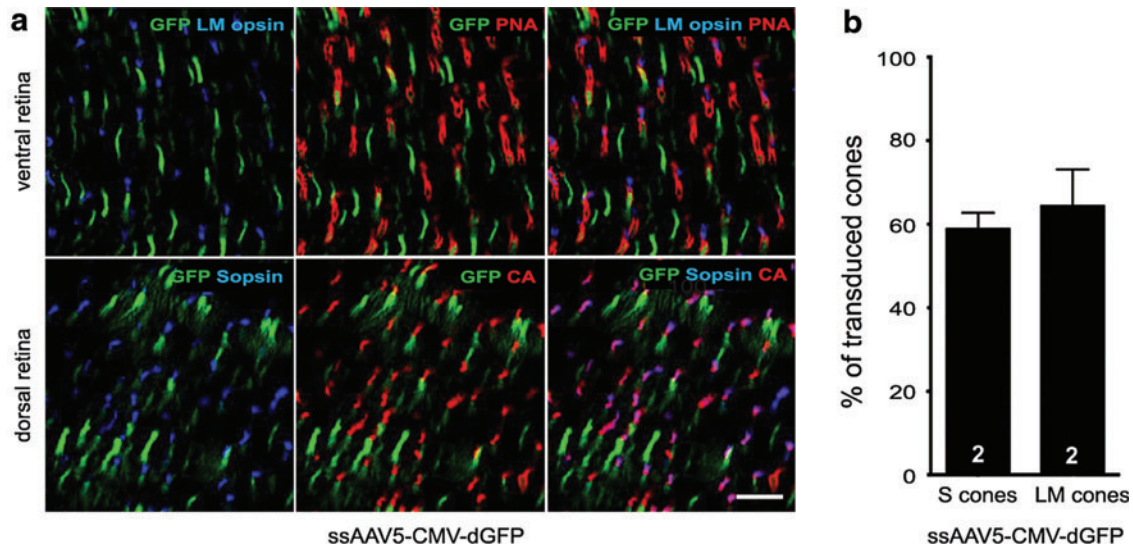

**Supplementary Figure S3.** Subretinal injection of AAV5-CMV-*dGFP* at PND1 directs GFP expression in both LM and S cones. PND1 mice were subretinally injected with AAV2/5-CMV-dGFP and sacrificed 3 wpi. Retinal flat mounts were labeled using anti-LM opsin or anti-S opsin immunostaining (*blue*) to distinguish the two subtypes of cone photoreceptors. In addition, the total population of cones was labeled using PNA or anti-CA immunostaining (*red*). **(a)** Representative images and **(b)** quantification of the percentage of GFP<sup>+</sup>-LM and GFP<sup>+</sup>-S cone photoreceptors. The quantification revealed that LM and S cones are transduced with the same efficacy. Error bars represent *SD*. Numbers in bars represent the number of retinas analyzed. Scale bar = 25  $\mu$ m.
