# Supplementary material
Source: PubMed Central journal article supplement (PMC5488363)
Supplement: Supp_Figure4.pdf [file Supp_Figure4.pdf]

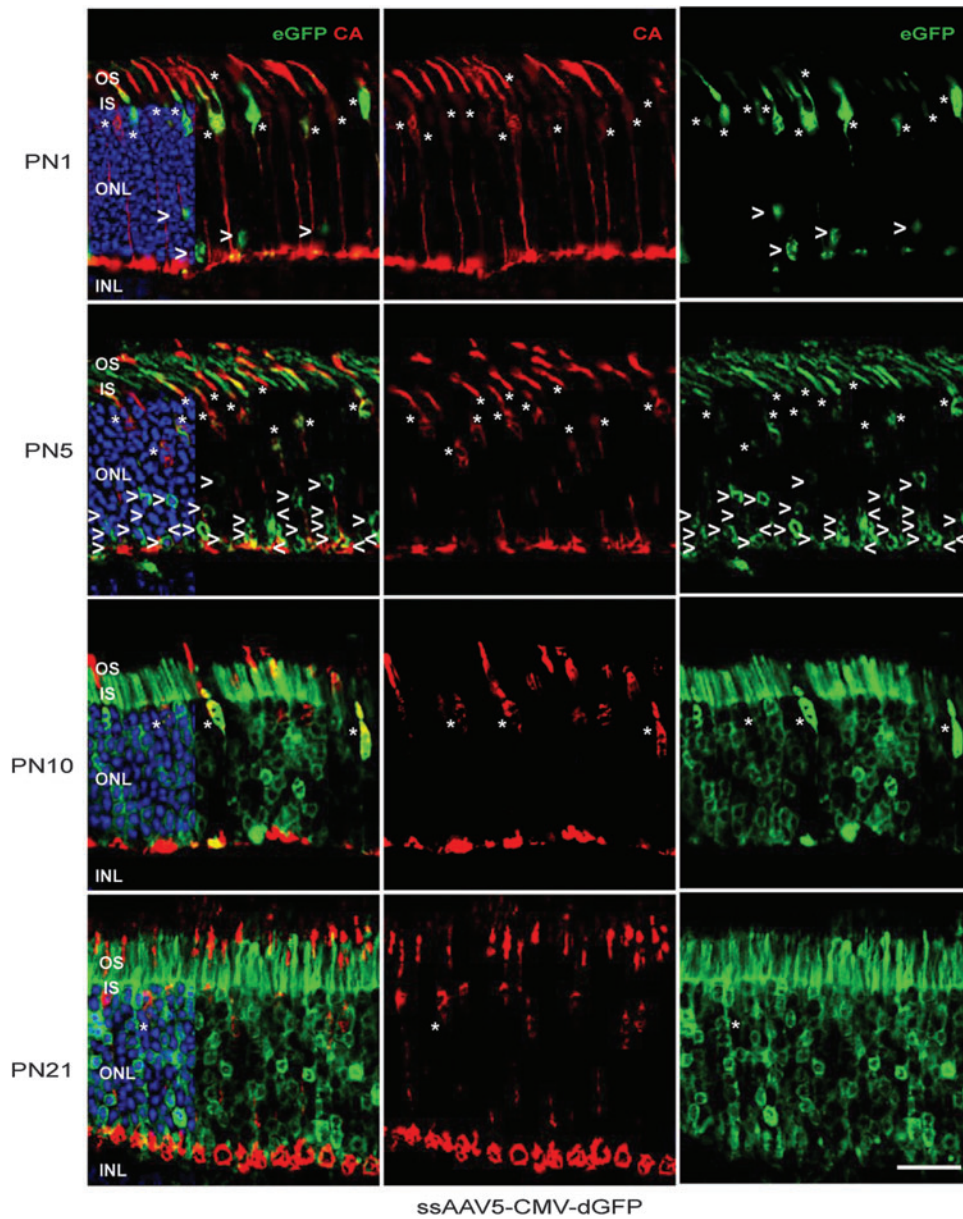

**Supplementary Figure S4.** Rod development coincides with increased rod transduction after subretinal delivery. Histological analysis showing the expression of dGFP after subretinal injection of ssAAV2/5-CMV-dGFP in the developing mouse retina at PND indicated. Tissue was harvested 3wpi. Immunostaining against CA (*red*) shows a high level of GFP<sup>+</sup> (*green*) cones after PND1 injection. A progressive decrease in the number of GFP-expressing cones is observed the later the injection is performed, while the number of GFP-expressing rods increases with later injection time points. RPE cells were artificially removed using Photoshop. Asterisks indicate GFP<sup>+</sup> cones. Arrowheads indicate GFP<sup>+</sup> rods. Scale bars=25 μm.
