# Supplementary material
Source: PubMed Central journal article supplement (PMC5488363)
Supplement: Supp_Figure5.pdf [file Supp_Figure5.pdf]

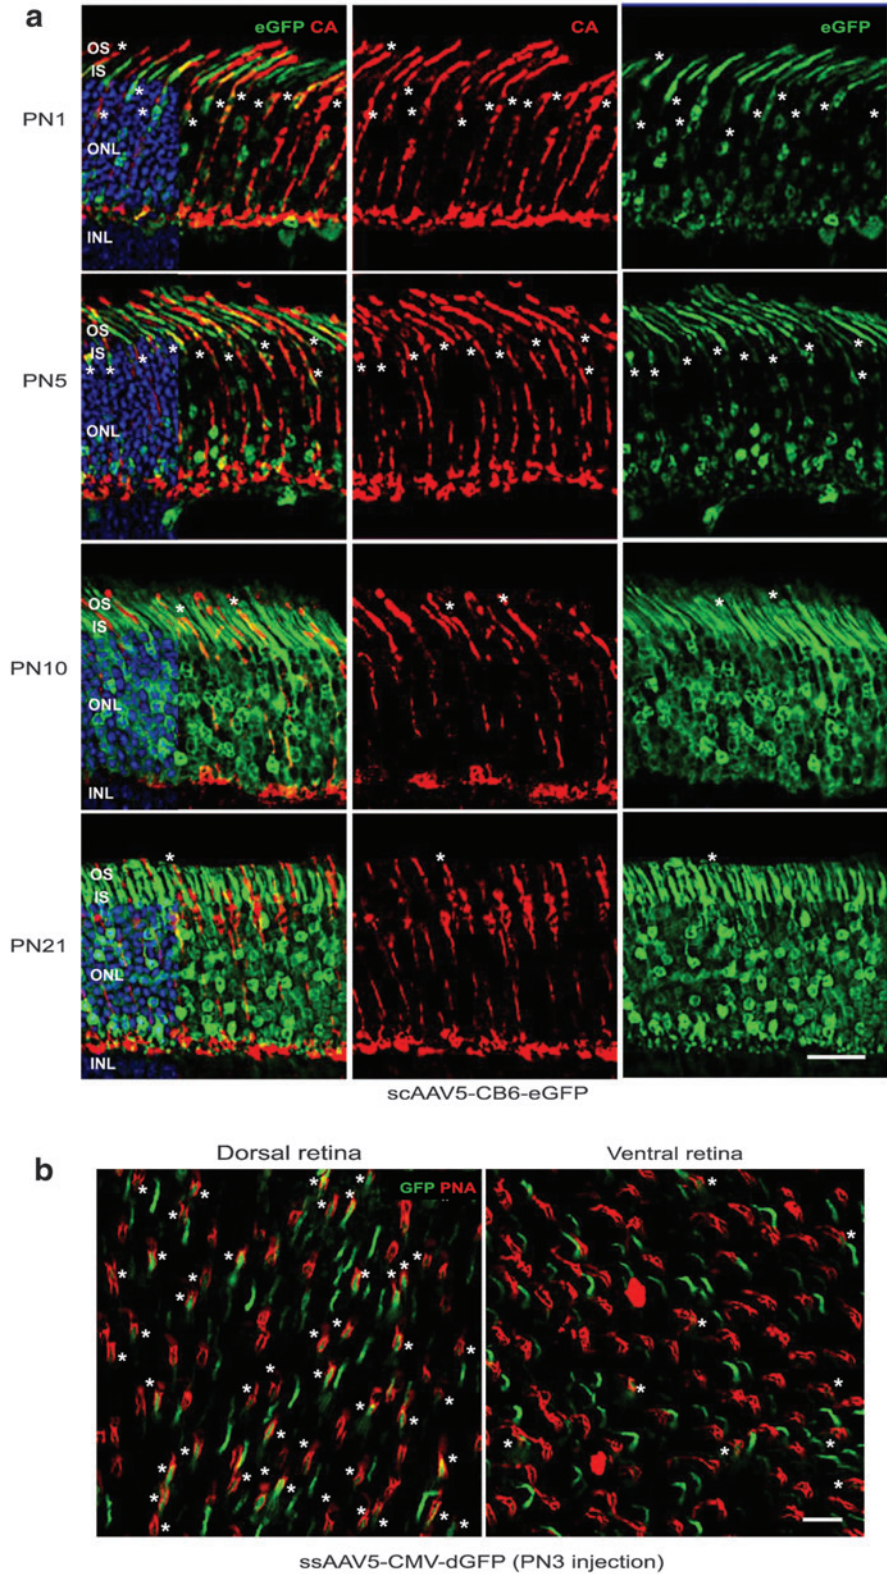

**Supplementary Figure S5.** Progressive increase in the number of GFP-expressing rods during retinal development. **(a)** Histological analysis showing the expression of eGFP after subretinal injection of scAAV2/5-CB6-eGFP in the developing mouse retina at PND indicated. Tissue was harvested 3wpi. Immunostaining against CA (*red*) shows a high level of GFP<sup>+</sup> cones after PND1 injection. A progressive decrease in the number of GFP-expressing cones is observed the later the injection is performed, while the number of GFP-expressing rods increases with later injection time points. RPE cells were artificially removed using Photoshop. **(b)** Representative retinal flat mount images of the dorsal and ventral portions of retinas from mice injected at PND3 with AAV5-CMV-dGFP and harvested 3wpi. Within the dorsal retina, the vast majority of GFP<sup>+</sup> cells (*green*) are positive for the cone-specific marker PNA (*red*). In contrast, within the ventral retina, the vast majority of GFP<sup>+</sup> cells are rods. Asterisks indicate GFP<sup>+</sup> cones. Scale bars = 25  $\mu$ m.
