# Supplementary material
Source: PubMed Central journal article supplement (PMC5488363)
Supplement: Supp_Figure6.pdf [file Supp_Figure6.pdf]

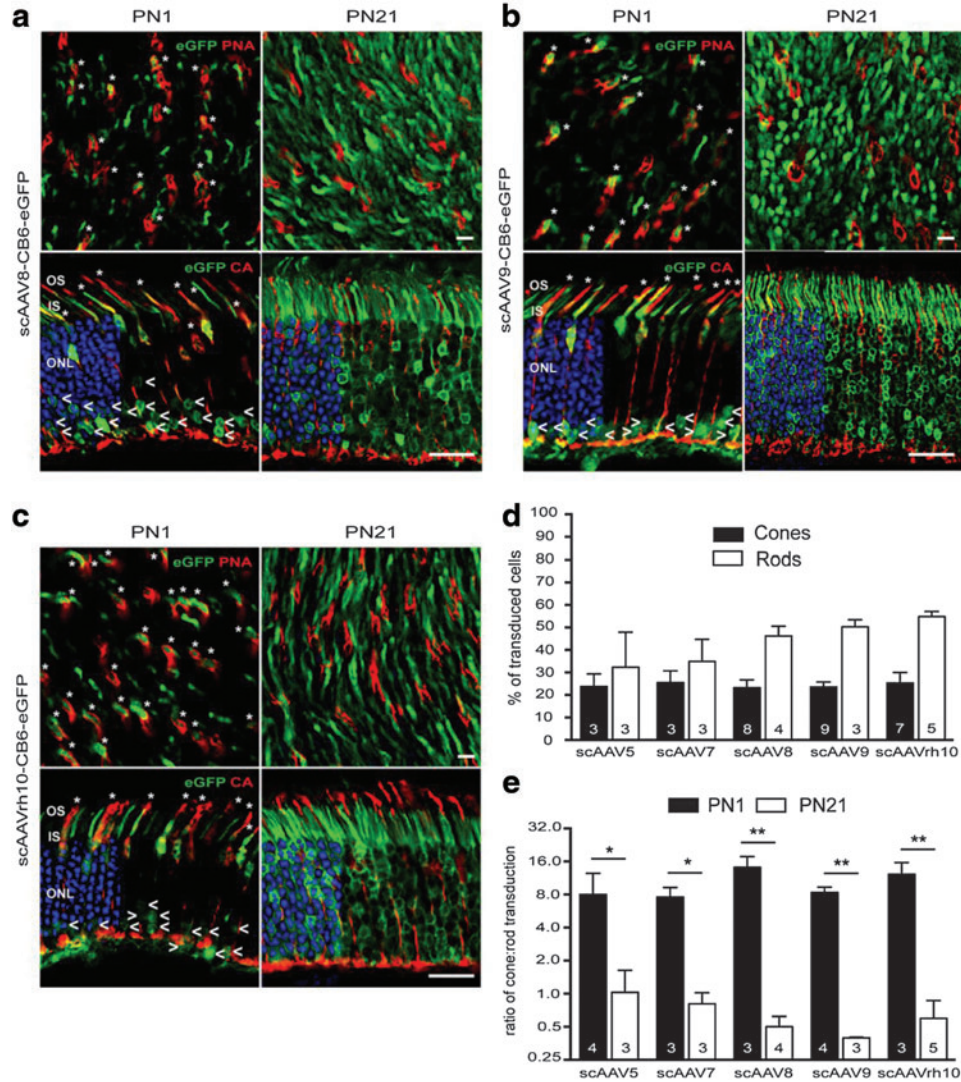

**Supplementary Figure S6.** Comparison of photoreceptor transduction between PND1 and PND21 subretinal injections. PND1 and PND21 mice were subretinally injected with similar doses of scAAV2/5, scAAV2/7, scAAV2/8, scAAV2/9, and scAAVrh10 vectors. **(a-c)** Shown are representative images of retinal flat mounts and cryosections of **(a)** scAAV2/8, **(b)** scAAV2/9, and **(c)** scAAV2/rh10 injected at the age indicated. Three weeks post injection, retinas were processed and stained for PNA or CA expression (red). AAV-mediated GFP was detected by its native fluorescence (green). Asterisks indicate GFP<sup>+</sup> cones. Arrowheads indicate GFP<sup>+</sup> rods. **(d)** Efficiency of cone and rod transduction after injection of the five different vectors at PND21. Shown is the percentage of GFP<sup>+</sup> cones/total cones and GFP<sup>+</sup> rods/total rods in the vector-exposed area. Comparison of cone transduction/rod transduction at PND1 and PND21 for the five different vectors is shown in **(e)**. Error bars on the graphs represent standard deviation. Numbers in bars represent the number of retina analyzed. \* $p < 0.05$  and \*\* $p < 0.01$  by Student's *t*-test. Scale bars = 25  $\mu$ m.
