# Supplementary material
Source: PubMed Central journal article supplement (PMC5488363)
Supplement: Supp_Figure7.pdf [file Supp_Figure7.pdf]

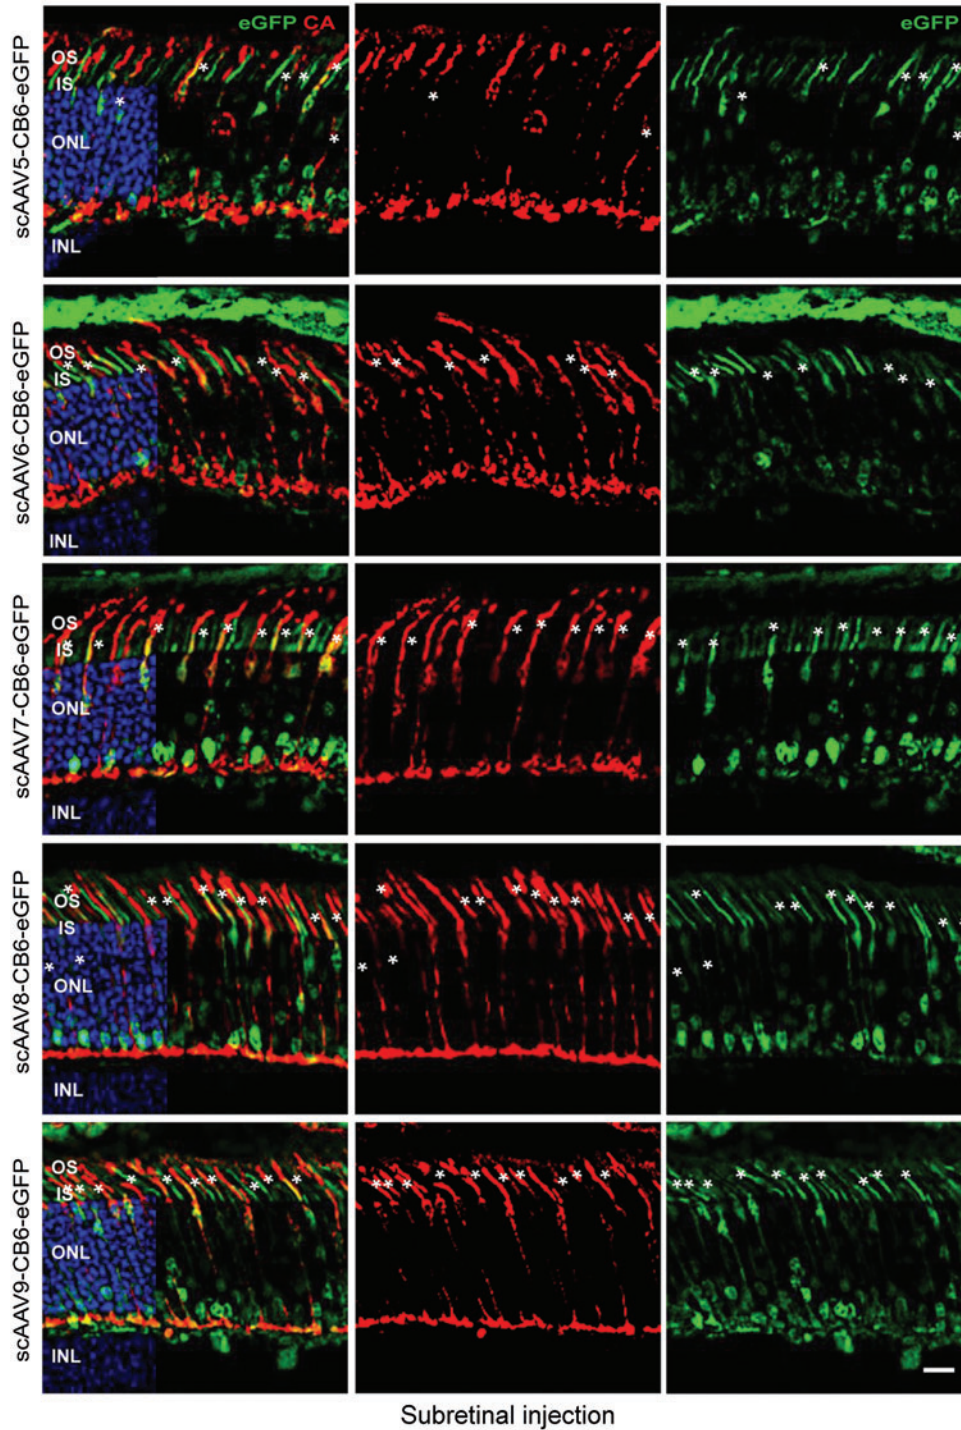

**Supplementary Figure S7.** Rod and cone transduction after subretinal injection of different AAV serotypes at PND1. PND1 mice were subretinally injected with similar doses of scAAV2/5, scAAV6, scAAV2/7, scAAV2/8, and scAAV2/9 vectors and sacrificed at 3 wpi. Retinal cryosections were immunostained against CA (*red*). AAV-mediated GFP was detected by its native fluorescence (*green*). Cones are the predominant photoreceptor cell type transduced after injection of all tested vectors. Asterisks indicate GFP<sup>+</sup> cones. Scale bars = 25  $\mu$ m.
